# Supplementary material
Source: HighWire-hosted journal article supplement (https://cmajopen.ca/highwire/filestream/89691/field_highwire_adjunct_files/1/open-2022-0095-2-at.pdf)
Supplement: open-2022-0095-2-at.pdf [file open-2022-0095-2-at.pdf]

**Appendix Table 2 for:**

**Walk-in Clinic Patient Characteristics and Utilization Patterns in Ontario, Canada: A Cross-Sectional Study**

**Appendix Table 2.** Search Terms and Counts of Business Names from the Corporate Provider Database. *Business names that contained the key terms ‘walk-in’, ‘clinic’, ‘centre’/‘center’/‘ctre’, ‘group’, ‘medical’/‘med’, ‘after hours’/‘aft hours’/‘after-hours’ were Google-searched. Ambiguous names that could possibly be a walk-in clinic (e.g., ‘doctor’, ‘health services’, ‘health’ in the absence of any specialization) were similarly Google-searched. All Google-searched clinics were included in the final list if the business website suggested exclusive operation as a walk-in clinic; if it also functioned as a family practice, specialty practice, or urgent care (clinics with access to rapid diagnostic imaging), then it was excluded. In the case of no website available, we only included clinics with ‘walk-in’ in the business name, without any mention of family practice, specialty practice, or urgent care.*

| Search Term                 | Possible Walk-in Clinic Business Names (N = 497) | Combined Family Practices (N = 265) | Specialty Clinics (N = 6) | Urgent Care Clinics (N = 5) | Clinics                   |                           |
|-----------------------------|--------------------------------------------------|-------------------------------------|---------------------------|-----------------------------|---------------------------|---------------------------|
|                             |                                                  |                                     |                           |                             | Not Found Online (N = 98) | Walk-In Clinics (N = 123) |
| Walk-In/Walkin/Walk In      | 94                                               | 28                                  | 0                         | 0                           | 0                         | 66                        |
| Medical/Clinic/Centre/Group | 332                                              | 216                                 | 3                         | 4                           | 66                        | 43                        |
| After Hours                 | 17                                               | 3                                   | 0                         | 0                           | 7                         | 7                         |
| Miscellaneous*              | 54                                               | 18                                  | 3                         | 1                           | 25                        | 7                         |

\* “Doctor”, “Drs”, “health”, “med,” without either terms suggesting a medical specialty (i.e. not primary care) or a hospital clinic name.
